# Supplementary material for: Higher Prevalence of Elevated Albumin Excretion in Youth With Type 2 Than Type 1 Diabetes
Source: Oxford University Press journal article supplement (doi:10.2337/dc07-0450), 2007-09-28
Supplement: dc070450onlineappendix.doc [file dc070450onlineappendix.doc]

SEARCH Investigators

*California*: Jean M. Lawrence, ScD, MPH, MSSA, Diana B. Petitti, MD, MPH, Ann K. Kershnar, MD, Kaiser Permanente Southern California and David J. Pettitt, MD, for the Sansum Diabetes Research Institute; *Colorado*: Dana Dabelea, MD, PhD, Richard F. Hamman, MD, DrPH, Lisa Testaverde, MS, for the Department of Preventive Medicine and Biometrics, and Stephen Daniels, MD, PhD, for the Department of Pediatrics, University of Colorado at Denver and Health Sciences Center, Georgeanna J. Klingensmith, MD and Marian J. Rewers, MD, PhD, for the Barbara Davis Center for Childhood Diabetes, Clifford A. Bloch, MD, for the Pediatric Endocrine Associates, Jonathan Krakoff, MD and Peter H. Bennett, MB, FRCP, for the NIDDK Pima Indian Study

*Hawaii*: Beatriz L. Rodriguez, MD, PhD, Beth Waitzfelder, PhD, Wilfred Fujimoto, MD, J. David Curb, MD, Fiona Kennedy, RN, Greg Uramoto, MD, Sorrell Waxman, MD, Teresa Hillier, MD, Richard Chung, MD, for the Pacific Health Research Institute; *Ohio*: Lawrence M. Dolan, MD, Debra Standiford, MSN, CNP, for the Cincinnati Children’s Hospital Medical Center

*South Carolina*: Elizabeth J. Mayer-Davis, PhD, Angela D. Liese, PhD, MPH, Robert McKeown, PhD, Robert R. Moran, PhD, I. David Schwartz, MD for the University of South Carolina, Lynne Hartel, MA, Linda Ambrose, RN, Yaw Appiagyei-Dankah, MD, Lyndon Key, MD, for the Medical University of South Carolina, James Amrhein, MD for Greenville Hospital Systems, Pam Clark, MD for McLeod Pediatric Subspecialists, Andy Muir, MD for the Medical College of Georgia, Mark Parker, MD, Lisa Houchin, MD for Pediatric Endocrinology & Diabetes Specialists

*Washington*: Catherine Pihoker, MD, Lisa Gilliam, MD, PhD, Irl Hirsch, MD, Lenna L. Liu, MD, MPH, Carolyn Paris, MD, MPH, for the University of Washington, Jenny Tseng, PhD for the Seattle Children’s Hospital and Regional Medical Center, and Carla Greenbaum, MD for Benaroya Research Institute

*Centers for Disease Control and Prevention*: Giuseppina Imperatore, MD, PhD, Desmond E. Williams, MD, PhD, Michael M. Engelgau, MD, Henry Kahn, MD, K.M Venkat Narayan, MD, MPH

*National Institute of Diabetes and Digestive and Kidney Diseases, NIH*: Barbara Linder, MD, PhD

*Central Laboratory (University of Washington):* Santica Marcovina, PhD

*Coordinating Center (Wake Forest University School of Medicine)*: Ronny Bell, PhD, MS, Ralph D’Agostino, Jr., PhD, Douglas Case, PhD, Timothy Morgan, PhD, Beverly Snively, PhD
